# Supplementary material
Source: PubMed Central journal article supplement (PMC6143111)
Supplement: jamainternmed-178-1086-s001.pdf [file jamainternmed-178-1086-s001.pdf]

## Supplementary Online Content

Loftfield E, Cornelis MC, Caporaso N, Yu K, Sinha R, Freedman N. Association of coffee drinking with mortality by genetic variation in caffeine metabolism: findings from the UK Biobank. Published online July 2, 2018. *JAMA Intern Med*. doi:10.1001/jamainternmed.2018.2425

**eTable 1.** Association between coffee intake and all-cause mortality in the UK Biobank stratified by weighted genetic caffeine metabolism score (wCMS<sub>G</sub>)

**eTable 2.** Association between coffee intake and all-cause mortality in the UK Biobank stratified by CYP1A2 genotype (rs762551)

**eTable 3.** Association between coffee intake and all-cause mortality in the UK Biobank stratified by unweighted genetic caffeine metabolism score (CMS<sub>G</sub>)

**eTable 4.** Association between coffee intake and all-cause and cause-specific mortality in the UK Biobank by length of follow-up time

This supplementary material has been provided by the authors to give readers additional information about their work.

**eTable 1. Association between coffee intake and all-cause mortality in the UK Biobank stratified by weighted genetic caffeine metabolism score (wCMS<sub>G</sub>)<sup>d</sup>**

|                                 | Coffee Consumption (cups/day) |                  |                  |                  |                  |                  | P-Trend <sup>e</sup> | P-Heterogeneity <sup>f</sup> |
|---------------------------------|-------------------------------|------------------|------------------|------------------|------------------|------------------|----------------------|------------------------------|
|                                 | None                          | <1               | 1                | 2-3              | 4-5              | ≥6               |                      |                              |
| Overall (n=403,816)             |                               |                  |                  |                  |                  |                  |                      |                              |
| No. of deaths                   | 2,654                         | 786              | 2,141            | 3,256            | 1,546            | 867              |                      |                              |
| HR (95% CI) <sup>a</sup>        | 1.00                          | 0.94 (0.87-1.02) | 0.91 (0.86-0.97) | 0.87 (0.83-0.92) | 0.86 (0.80-0.92) | 0.84 (0.77-0.91) | <0.0001              |                              |
| wCMS <sub>G2</sub> <sup>b</sup> |                               |                  |                  |                  |                  |                  |                      |                              |
| 0 to 1 (n=139,311)              |                               |                  |                  |                  |                  |                  |                      |                              |
| No. of deaths                   | 982                           | 291              | 751              | 1,031            | 511              | 257              |                      |                              |
| HR (95% CI) <sup>a</sup>        | 1.00                          | 0.94 (0.82-1.07) | 0.90 (0.81-0.99) | 0.83 (0.76-0.91) | 0.93 (0.83-1.05) | 0.91 (0.79-1.05) | 0.11                 |                              |
| >1 to 2 (n=178,336)             |                               |                  |                  |                  |                  |                  |                      |                              |
| No. of deaths                   | 1,151                         | 329              | 939              | 1,468            | 669              | 371              |                      |                              |
| HR (95% CI) <sup>a</sup>        | 1.00                          | 0.90 (0.80-1.02) | 0.91 (0.83-0.99) | 0.88 (0.81-0.96) | 0.83 (0.75-0.92) | 0.79 (0.69-0.89) | <0.0001              |                              |
| >2 to 3 (n=63,086)              |                               |                  |                  |                  |                  |                  |                      |                              |
| No. of deaths                   | 378                           | 115              | 345              | 567              | 269              | 170              |                      |                              |
| HR (95% CI) <sup>a</sup>        | 1.00                          | 0.99 (0.80-1.23) | 1.02 (0.88-1.19) | 0.93 (0.81-1.07) | 0.82 (0.70-0.97) | 0.82 (0.68-1.00) | 0.004                |                              |
| >3 (n=23,083)                   |                               |                  |                  |                  |                  |                  |                      |                              |
| No. of deaths                   | 143                           | 51               | 106              | 190              | 97               | 69               |                      |                              |
| HR (95% CI) <sup>a</sup>        | 1.00                          | 1.21 (0.87-1.67) | 0.81 (0.63-1.05) | 0.90 (0.71-1.13) | 0.81 (0.61-1.06) | 0.86 (0.63-1.18) | 0.17                 |                              |
| wCMS <sub>G4</sub> <sup>c</sup> |                               |                  |                  |                  |                  |                  |                      |                              |
| 0 to 2 (n=46,732)               |                               |                  |                  |                  |                  |                  |                      |                              |
| No. of deaths                   | 313                           | 101              | 236              | 317              | 145              | 64               |                      |                              |
| HR (95% CI) <sup>a</sup>        | 1.00                          | 1.00 (0.79-1.25) | 0.87 (0.73-1.03) | 0.82 (0.70-0.97) | 0.83 (0.67-1.02) | 0.70 (0.53-0.94) | 0.007                |                              |
| >2 to 4 (n=222,328)             |                               |                  |                  |                  |                  |                  |                      |                              |
| No. of deaths                   | 1,501                         | 429              | 1,220            | 1,745            | 830              | 462              |                      |                              |
| HR (95% CI) <sup>a</sup>        | 1.00                          | 0.91 (0.82-1.02) | 0.94 (0.87-1.01) | 0.85 (0.79-0.91) | 0.88 (0.80-0.96) | 0.89 (0.80-1.00) | 0.003                |                              |

>4 to 6 (n=101,845)

|                          |      |                   |                  |                  |                  |                  |         |
|--------------------------|------|-------------------|------------------|------------------|------------------|------------------|---------|
| No. of deaths            | 652  | 187               | 526              | 872              | 428              | 239              |         |
| HR (95% CI) <sup>a</sup> | 1.00 | 0.91 (0.77-1.097) | 0.88 (0.79-0.99) | 0.86 (0.77-0.95) | 0.80 (0.70-0.92) | 0.72 (0.61-0.84) | <0.0001 |

>6 (n=32,911)

|                          |      |                  |                  |                  |                  |                  |      |
|--------------------------|------|------------------|------------------|------------------|------------------|------------------|------|
| No. of deaths            | 188  | 69               | 159              | 322              | 143              | 102              |      |
| HR (95% CI) <sup>a</sup> | 1.00 | 1.19 (0.90-1.57) | 0.91 (0.74-1.13) | 1.10 (0.91-1.33) | 0.92 (0.73-1.16) | 0.98 (0.75-1.28) | 0.66 |

<sup>a</sup> Multivariable model is adjusted for age, sex, detailed smoking history (25-level variable incorporating current smoking status, smoking intensity (current and former smokers); time since quitting (former smokers), and cigar and pipe use (current and former smokers)); race/ethnicity (white, black, Asian, mixed, or other race); alcohol drinking (never drinker, former drinker, infrequent drinker (<1 drink/week), occasional drinker (>1 drink/week but <1 drink/day), moderate daily drinker (1 to 3 drinks/day), or heavy daily drinker (>3 drinks/day)); general health status (excellent, good, good, fair, or poor); education level (college or university degree, A levels/AS levels or equivalent, O levels/GCSEs or equivalent, CSEs or equivalent, NVQ or HND or HNC equivalent, or other professional qualifications); and body mass index (<18.5, 18.5 to <25, 25 to <30, 30 to <35, or ≥35 kg/m<sup>2</sup>); physical activity (0, 1-2, 3-4, or ≥5 days of >10 minutes of moderate or vigorous intensity activity); tea intake (none, <1, 1, 2 or 3, 4 or 5, or ≥6 cups/day)

<sup>b</sup> wCMS<sub>G2</sub> defined using 2 SNPs, *AHR CYP1A2*

<sup>c</sup> wCMS<sub>G4</sub> defined using 4 SNPs, *AHR CYP1A2 POR CYP2A6*

<sup>d</sup> Genetic caffeine metabolism scores were weighted by summing the number of alleles multiplied by their beta coefficients (See Methods). The latter were estimated by  $z/(\sqrt{p(1-p)})$  where z is the SNP z-score for the paraxanthine to caffeine ratio and p is the SNP minor allele frequency. Weighted scores were then calibrated such that wCMSG2 and wCMSG4 scores ranged from 0 to 4 and from 0 to 8, respectively, with higher scores predicting faster caffeine metabolism

<sup>e</sup> P-trend corresponds to the X<sup>2</sup> test statistic for coffee intake as a continuous variable, using the midpoint of each category and a value of 6 for ≥6 cups/day

<sup>f</sup> P-Heterogeneity corresponds to the X<sup>2</sup> test statistic for the likelihood ratio test comparing the models with and without the interaction term between the coffee (cups/day) and the CMS variable of interest (continuous score)

**eTable 2. Association between coffee intake and all-cause mortality in the UK Biobank stratified by *CYP1A2* genotype (rs762551)**

| rs762551                 | Coffee Consumption (cups/day) |                  |                  |                  |                  |                  | P-Trend <sup>b</sup> | P-Heterogeneity <sup>c</sup> |
|--------------------------|-------------------------------|------------------|------------------|------------------|------------------|------------------|----------------------|------------------------------|
|                          | None                          | <1               | 1                | 2-3              | 4-5              | ≥6               |                      |                              |
| <b>C/C</b> (n=31,953)    |                               |                  |                  |                  |                  |                  |                      | 0.84                         |
| No. of deaths            | 244                           | 68               | 156              | 241              | 105              | 53               |                      |                              |
| HR (95% CI) <sup>a</sup> | 1.00                          | 0.96 (0.73-1.27) | 0.78 (0.64-0.96) | 0.78 (0.65-0.95) | 0.77 (0.60-0.98) | 0.69 (0.51-0.95) | 0.009                |                              |
| <b>A/C</b> (n=162,268)   |                               |                  |                  |                  |                  |                  |                      |                              |
| No. of deaths            | 1045                          | 304              | 874              | 1280             | 642              | 325              |                      |                              |
| HR (95% CI) <sup>a</sup> | 1.00                          | 0.93 (0.82-1.06) | 0.96 (0.88-1.05) | 0.89 (0.81-0.97) | 0.94 (0.85-1.05) | 0.82 (0.72-0.94) | 0.01                 |                              |
| <b>A/A</b> (n=20,9595)   |                               |                  |                  |                  |                  |                  |                      |                              |
| No. of deaths            | 1365                          | 414              | 1111             | 1735             | 799              | 489              |                      |                              |
| HR (95% CI) <sup>a</sup> | 1.00                          | 0.95 (0.85-1.07) | 0.90 (0.83-0.98) | 0.87 (0.81-0.94) | 0.81 (0.74-0.89) | 0.87 (0.77-0.97) | <.0001               |                              |

<sup>a</sup> Multivariable model is adjusted for age, sex, detailed smoking history (25-level variable incorporating current smoking status, smoking intensity (current and former smokers); time since quitting (former smokers), and cigar and pipe use (current and former smokers)); race/ethnicity (white, black, Asian, mixed, or other race); alcohol drinking (never drinker, former drinker, infrequent drinker (<1 drink/week), occasional drinker (>1 drink/week but <1 drink/day), moderate daily drinker (1 to 3 drinks/day), or heavy daily drinker (>3 drinks/day)); general health status (excellent, good, good, fair, or poor); education level (college or university degree, A levels/AS levels or equivalent, O levels/GCSEs or equivalent, CSEs or equivalent, NVQ or HND or HNC equivalent, or other professional qualifications); and body mass index (<18.5, 18.5 to <25, 25 to <30, 30 to <35, or ≥35 kg/m<sup>2</sup>); physical activity (0, 1-2, 3-4, or ≥5 days of >10 minutes of moderate or vigorous intensity activity); tea intake (none, <1, 1, 2 or 3, 4 or 5, or ≥6 cups/day)

<sup>b</sup> P-trend corresponds to the X<sup>2</sup> test statistic for coffee intake as a continuous variable, using the midpoint of each category and a value of 6 for ≥6 cups/day

<sup>c</sup> P-Heterogeneity corresponds to the X<sup>2</sup> test statistic for the likelihood ratio test comparing the models with and without the interaction term between coffee (continuous) and the stratifying variable *CYP1A2* genotype (ordinal)

**eTable 3. Association between coffee intake and all-cause mortality in the UK Biobank stratified by unweighted genetic caffeine metabolism score (CMS<sub>G</sub>)**

|                                     | Coffee Consumption (cups/day) |                  |                  |                  |                  |                  |                      |                              |
|-------------------------------------|-------------------------------|------------------|------------------|------------------|------------------|------------------|----------------------|------------------------------|
|                                     | None                          | <1               | 1                | 2-3              | 4-5              | ≥6               | P-Trend <sup>d</sup> | P-Heterogeneity <sup>e</sup> |
| <b>Overall</b><br>(n=40,3816)       |                               |                  |                  |                  |                  |                  |                      |                              |
| No. of deaths                       | 2,654                         | 786              | 2,141            | 3,256            | 1,546            | 867              |                      |                              |
| HR (95% CI) <sup>a</sup>            | 1.00                          | 0.94 (0.87-1.02) | 0.91 (0.86-0.97) | 0.87 (0.83-0.92) | 0.86 (0.80-0.92) | 0.84 (0.77-0.91) | <.0001               |                              |
| <b>CMS<sub>G2</sub><sup>b</sup></b> |                               |                  |                  |                  |                  |                  |                      | 0.81                         |
| <b>0 or 1</b> (n=158,995)           |                               |                  |                  |                  |                  |                  |                      |                              |
| No. of deaths                       | 1,117                         | 331              | 872              | 1,183            | 574              | 307              |                      |                              |
| HR (95% CI) <sup>a</sup>            | 1.00                          | 0.93 (0.83-1.06) | 0.90 (0.83-0.99) | 0.82 (0.75-0.90) | 0.90 (0.81-1.00) | 0.92 (0.80-1.05) | 0.03                 |                              |
| <b>2</b> (n=162,134)                |                               |                  |                  |                  |                  |                  |                      |                              |
| No. of deaths                       | 1,040                         | 291              | 840              | 1,344            | 624              | 337              |                      |                              |
| HR (95% CI) <sup>a</sup>            | 1.00                          | 0.90 (0.79-1.02) | 0.91 (0.83-1.00) | 0.90 (0.83-0.98) | 0.86 (0.77-0.96) | 0.79 (0.69-0.90) | 0.0006               |                              |
| <b>3 or 4</b> (n=82,687)            |                               |                  |                  |                  |                  |                  |                      |                              |
| No. of deaths                       | 497                           | 164              | 429              | 729              | 348              | 223              |                      |                              |
| HR (95% CI) <sup>a</sup>            | 1.00                          | 1.08 (0.90-1.29) | 0.95 (0.83-1.08) | 0.91 (0.81-1.03) | 0.80 (0.69-0.93) | 0.80 (0.67-0.95) | 0.0004               |                              |
| <b>CMS<sub>G4</sub><sup>c</sup></b> |                               |                  |                  |                  |                  |                  |                      | 0.16                         |
| <b>0 to 2</b> (n=96,734)            |                               |                  |                  |                  |                  |                  |                      |                              |
| No. of deaths                       | 676                           | 204              | 533              | 682              | 321              | 159              |                      |                              |
| HR (95% CI) <sup>a</sup>            | 1.00                          | 0.94 (0.80-1.10) | 0.92 (0.82-1.03) | 0.81 (0.72-0.90) | 0.87 (0.76-1.01) | 0.84 (0.70-1.01) | 0.007                |                              |
| <b>3</b> (n=113,368)                |                               |                  |                  |                  |                  |                  |                      |                              |
| No. of deaths                       | 761                           | 217              | 626              | 898              | 429              | 235              |                      |                              |
| HR (95% CI) <sup>a</sup>            | 1.00                          | 0.92 (0.79-1.07) | 0.96 (0.86-1.07) | 0.86 (0.78-0.95) | 0.87 (0.77-0.99) | 0.85 (0.73-1.00) | 0.007                |                              |
| <b>4</b> (n=107,630)                |                               |                  |                  |                  |                  |                  |                      |                              |
| No. of deaths                       | 703                           | 192              | 562              | 885              | 420              | 222              |                      |                              |
| HR (95% CI) <sup>a</sup>            | 1.00                          | 0.88 (0.75-1.03) | 0.89 (0.79-0.99) | 0.86 (0.77-0.95) | 0.83 (0.72-0.94) | 0.74 (0.63-0.87) | 0.0003               |                              |

**≥5** (n=86,084)

|                          |      |                  |                  |                  |                  |                  |      |
|--------------------------|------|------------------|------------------|------------------|------------------|------------------|------|
| No. of deaths            | 514  | 173              | 420              | 791              | 376              | 251              |      |
| HR (95% CI) <sup>a</sup> | 1.00 | 1.07 (0.90-1.27) | 0.89 (0.78-1.02) | 0.97 (0.86-1.09) | 0.88 (0.76-1.01) | 0.91 (0.77-1.07) | 0.14 |

<sup>a</sup> Multivariable model is adjusted for age, sex, detailed smoking history (25-level variable incorporating current smoking status, smoking intensity (current and former smokers); time since quitting (former smokers), and cigar and pipe use (current and former smokers)); race/ethnicity (white, black, Asian, mixed, or other race); alcohol drinking (never drinker, former drinker, infrequent drinker (<1 drink/week), occasional drinker (>1 drink/week but <1 drink/day), moderate daily drinker (1 to 3 drinks/day), or heavy daily drinker (>3 drinks/day)); general health status (excellent, good, good, fair, or poor); education level (college or university degree, A levels/AS levels or equivalent, O levels/GCSEs or equivalent, CSEs or equivalent, NVQ or HND or HNC equivalent, or other professional qualifications); and body mass index (<18.5, 18.5 to <25, 25 to <30, 30 to <35, or ≥35 kg/m<sup>2</sup>); physical activity (0, 1-2, 3-4, or ≥5 days of >10 minutes of moderate or vigorous intensity activity); tea intake (none, <1, 1, 2 or 3, 4 or 5, or ≥6 cups/day)

<sup>b</sup> CMS<sub>G2</sub> defined using 2 SNPs, *AHR CYP1A2*

<sup>c</sup> CMS<sub>G4</sub> defined using 4 SNPs, *AHR CYP1A2 POR CYP2A6*

<sup>d</sup> P-trend corresponds to the X<sup>2</sup> test statistic for coffee intake as a continuous variable, using the midpoint of each category and a value of 6 for ≥6 cups/day

<sup>e</sup> P-Heterogeneity corresponds to the X<sup>2</sup> test statistic for the likelihood ratio test comparing the models with and without the interaction term between the coffee (cups/day) and the CMS variable of interest (continuous score)

**eTable 4. Association between coffee intake and all cause and cause-specific mortality in the UK Biobank by length of follow-up time**

| Length of Follow-Up                       | Coffee Consumption (cups/day) |                  |                  |                  |                  |                  | P-Trend <sup>b</sup> |
|-------------------------------------------|-------------------------------|------------------|------------------|------------------|------------------|------------------|----------------------|
|                                           | None                          | <1               | 1                | 2-3              | 4-5              | ≥6               |                      |
| Years 0 to <3 of follow-up<br>(n=498,134) |                               |                  |                  |                  |                  |                  |                      |
| No. of deaths                             | 1,055                         | 300              | 834              | 1,242            | 564              | 317              |                      |
| HR (95% CI) <sup>a</sup>                  | 1.00                          | 0.93 (0.82-1.06) | 0.93 (0.85-1.02) | 0.87 (0.80-0.95) | 0.80 (0.72-0.89) | 0.75 (0.66-0.86) | <.0001               |
| Years 3 to <5 of follow-up<br>(n=493,816) |                               |                  |                  |                  |                  |                  |                      |
| No. of deaths                             | 1,010                         | 278              | 813              | 1,235            | 615              | 304              |                      |
| HR (95% CI) <sup>a</sup>                  | 1.00                          | 0.87 (0.76-1.00) | 0.92 (0.83-1.01) | 0.90 (0.82-0.98) | 0.95 (0.85-1.06) | 0.83 (0.72-0.95) | 0.07                 |
| Years ≥5 of follow-up<br>(n=489,561)      |                               |                  |                  |                  |                  |                  |                      |
| No. of deaths                             | 1,330                         | 416              | 1047             | 1,621            | 778              | 466              |                      |
| HR (95% CI) <sup>a</sup>                  | 1.00                          | 1.01 (0.91-1.13) | 0.91 (0.84-0.99) | 0.89 (0.82-0.96) | 0.89 (0.81-0.98) | 0.94 (0.84-1.06) | 0.04                 |

<sup>a</sup> Multivariable model is adjusted for age, sex, detailed smoking history (25-level variable incorporating current smoking status, smoking intensity (current and former smokers); time since quitting (former smokers), and cigar and pipe use (current and former smokers)); race/ethnicity (white, black, Asian, mixed, or other race); alcohol drinking (never drinker, former drinker, infrequent drinker (<1 drink/week), occasional drinker (>1 drink/week but <1 drink/day), moderate daily drinker (1 to 3 drinks/day), or heavy daily drinker (>3 drinks/day)); general health status (excellent, good, good, fair, or poor); education level (college or university degree, A levels/AS levels or equivalent, O levels/GCSEs or equivalent, CSEs or equivalent, NVQ or HND or HNC equivalent, or other professional qualifications); and body mass index (<18.5, 18.5 to <25, 25 to <30, 30 to <35, or ≥35 kg/m<sup>2</sup>); physical activity (0, 1-2, 3-4, or ≥5 days of >10 minutes of moderate or vigorous intensity activity); tea intake (none, <1, 1, 2 or 3, 4 or 5, or ≥6 cups/day)

<sup>b</sup> P-trend corresponds to the X<sup>2</sup> test statistic for coffee intake as a continuous variable, using the midpoint of each category and a value of 6 for ≥6 cups/day
